# Supplementary material for: Vitamin B12 is a limiting factor for induced cellular plasticity and tissue repair
Source: PubMed Central journal article supplement (PMC10663163; doi:10.1038/s42255-023-00916-6), 2023-11-16

**Figure 3c Source Data:**

Blot in paper (MEF1):

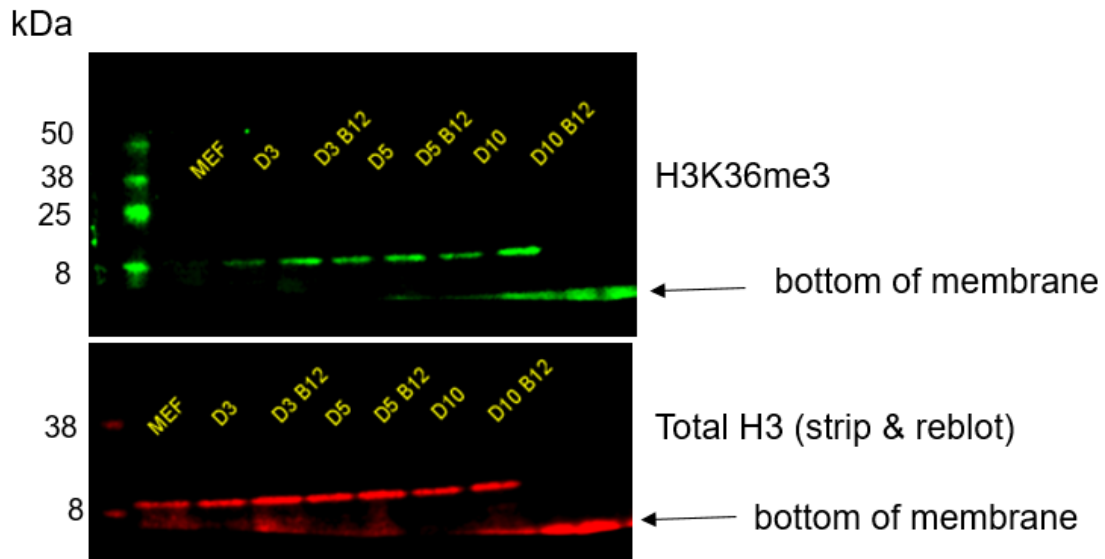

Additional MEFs:

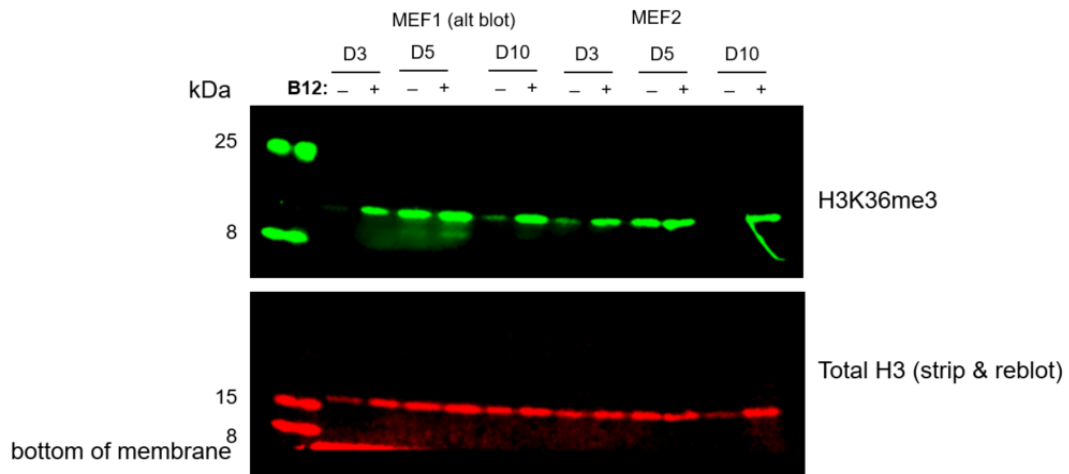

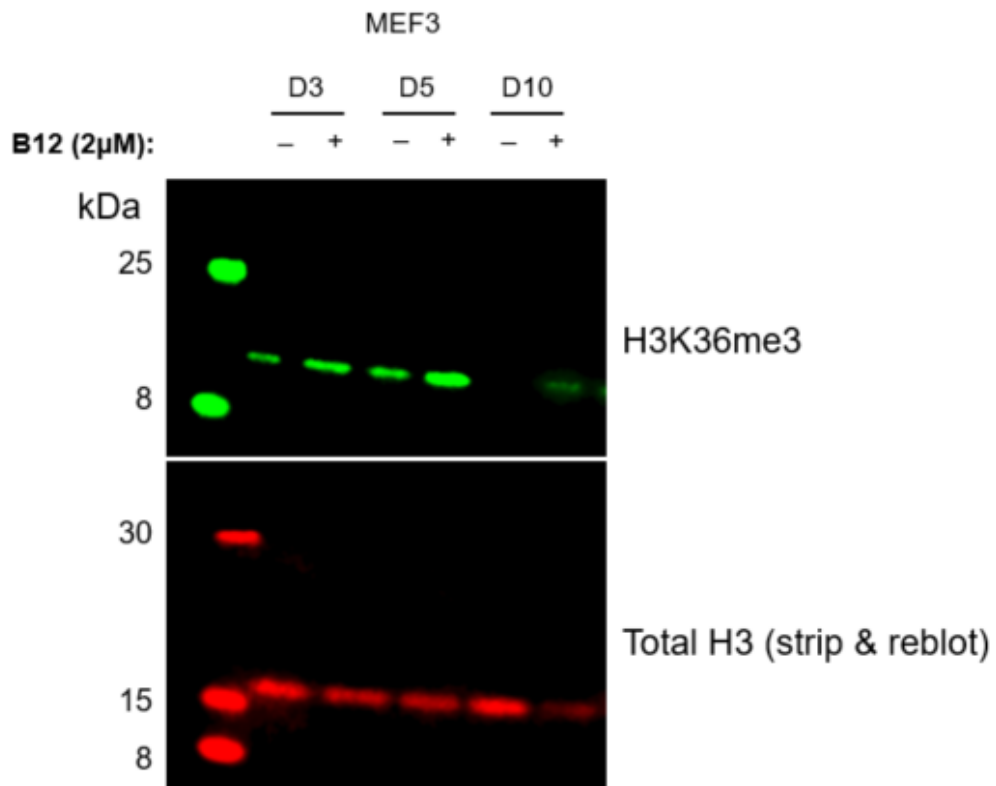

**Figure 3d Source Data:**

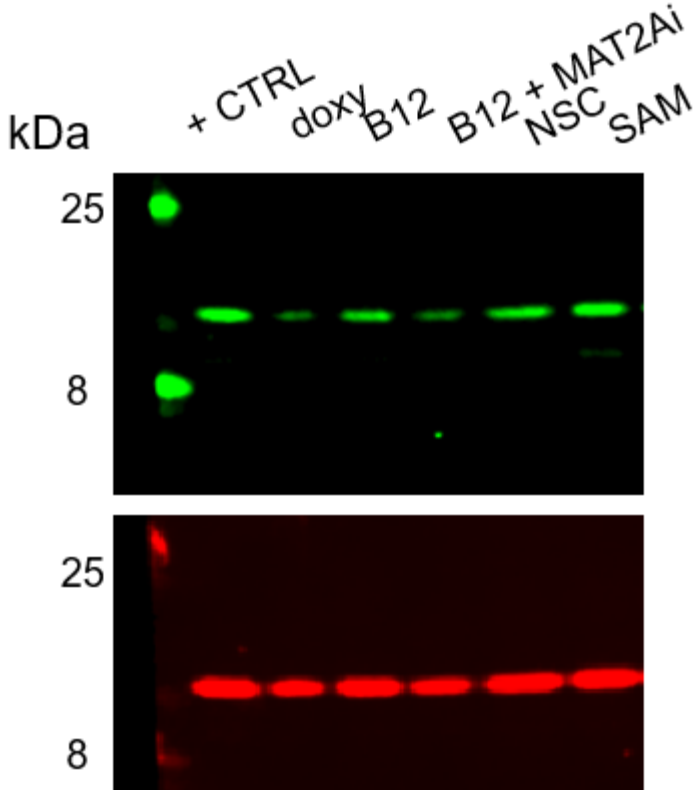

Supplement: 42255_2023_916_MOESM7_ESM.pdf [file 42255_2023_916_MOESM7_ESM.pdf]
