# Supplementary material for: Vitamin B12 is a limiting factor for induced cellular plasticity and tissue repair
Source: PubMed Central journal article supplement (PMC10663163; doi:10.1038/s42255-023-00916-6), 2023-11-16

**Extended Data Figure 5 Source Data:**

**Extended Data Fig.5a**

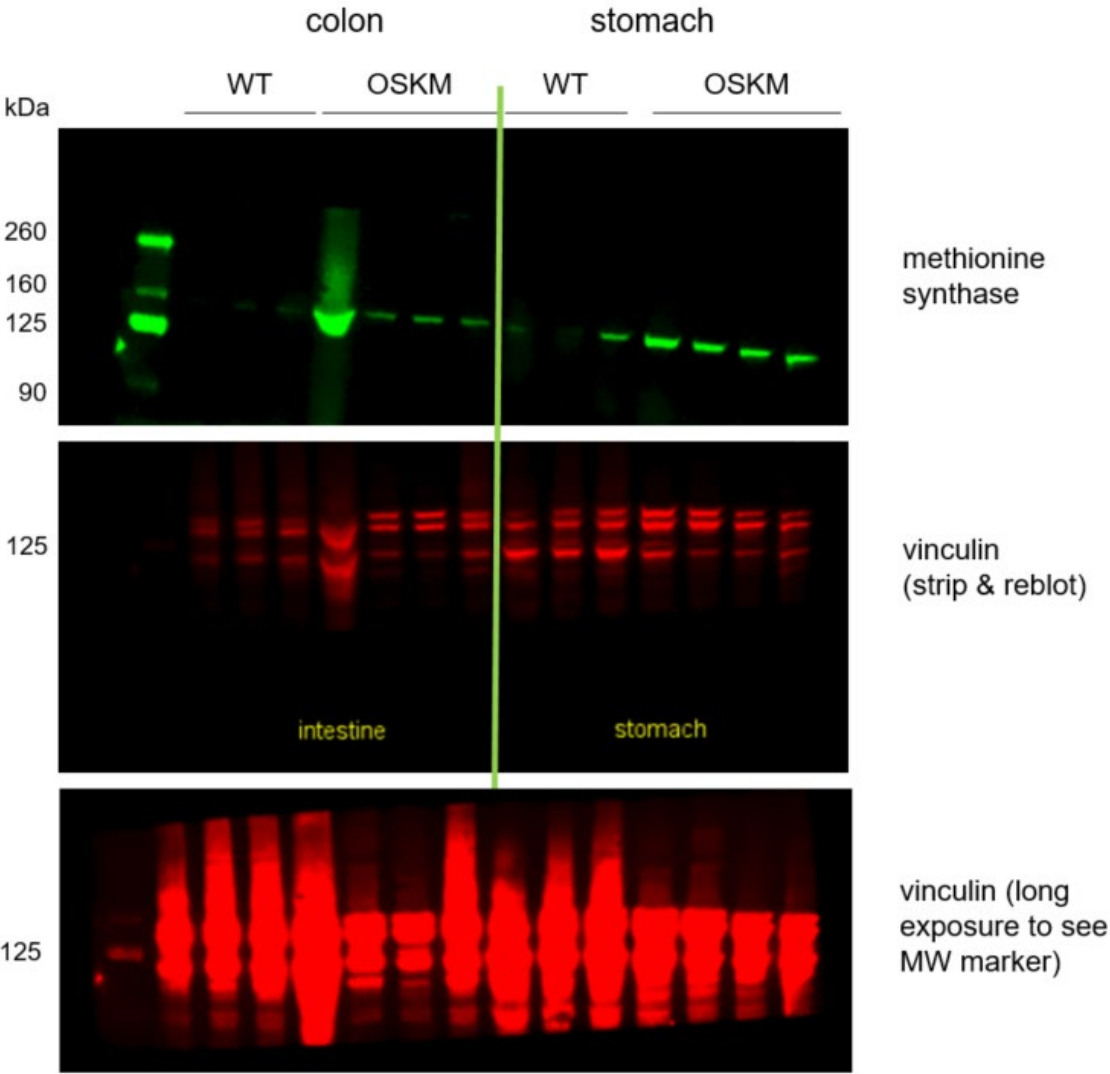

Supplement: 42255_2023_916_MOESM15_ESM.pdf [file 42255_2023_916_MOESM15_ESM.pdf]
